# Supplementary material
Source: PubMed Central journal article supplement (PMC8832303)
Supplement: jamaoncol-e217643-s002.pdf [file jamaoncol-e217643-s002.pdf]

## Supplementary Online Content

Nipp RD, Horick NK, Qian CL, et al. Effect of a symptom monitoring intervention for patients hospitalized with advanced cancer: a randomized clinical trial. *JAMA Oncology*. Published online February 10, 2022. doi:10.1001/jamaoncol.2021.7643

**eFigure 1.** Proportion of Days With Improved Symptoms

**eFigure 2.** Graphical Depiction of Competing Risk Regression for Readmissions

This supplementary material has been provided by the authors to give readers additional information about their work.

eFigure 1. Proportion of Days With Improved Symptoms

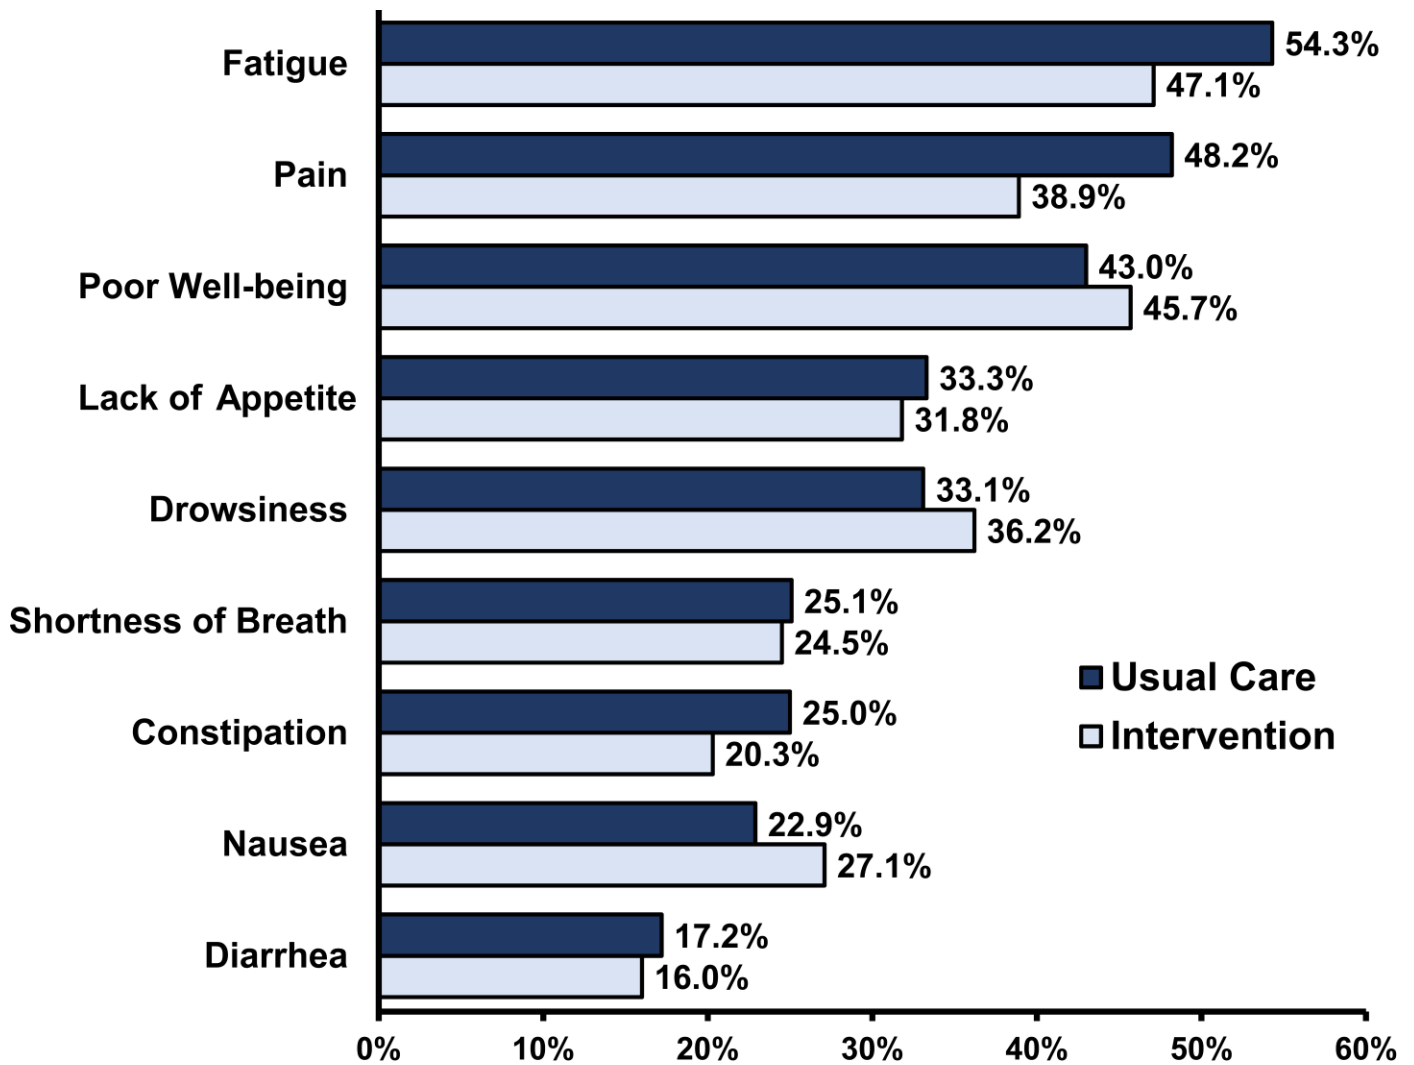

**eFigure 2. Graphical Depiction of Competing Risk Regression for Readmissions**

**A. Readmissions within 30 days**

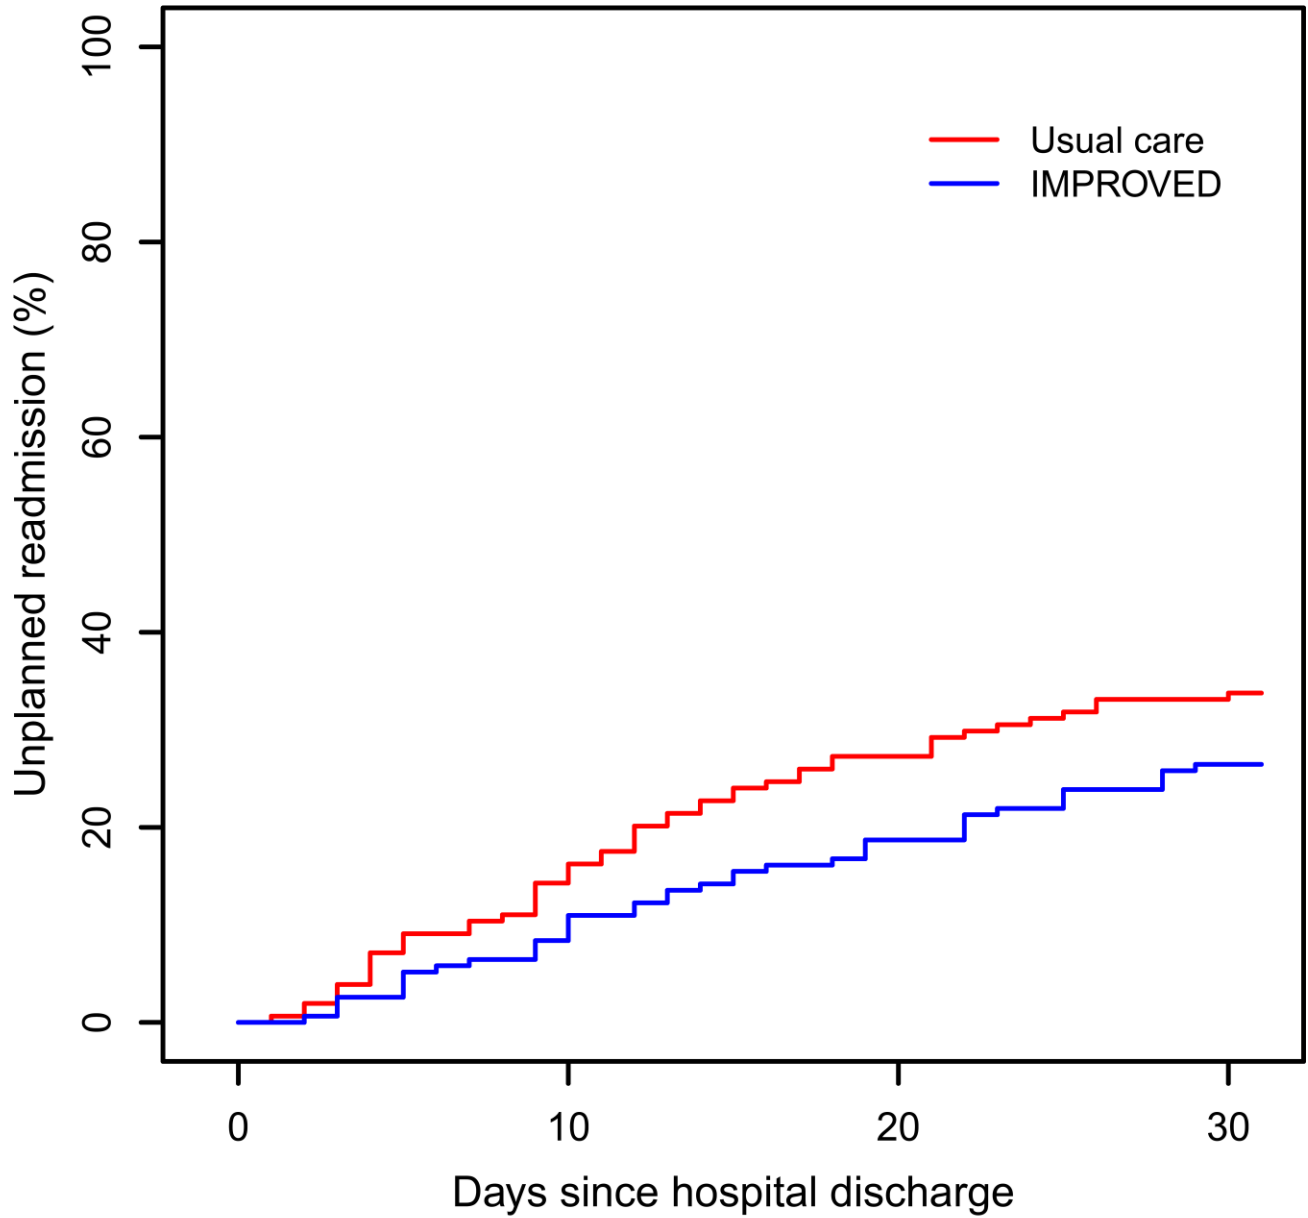

Number at risk

|            |     |     |     |    |
|------------|-----|-----|-----|----|
| Usual care | 154 | 126 | 102 | 90 |
| IMPROVED   | 155 | 130 | 108 | 91 |

**B. Readmissions within 90 days**

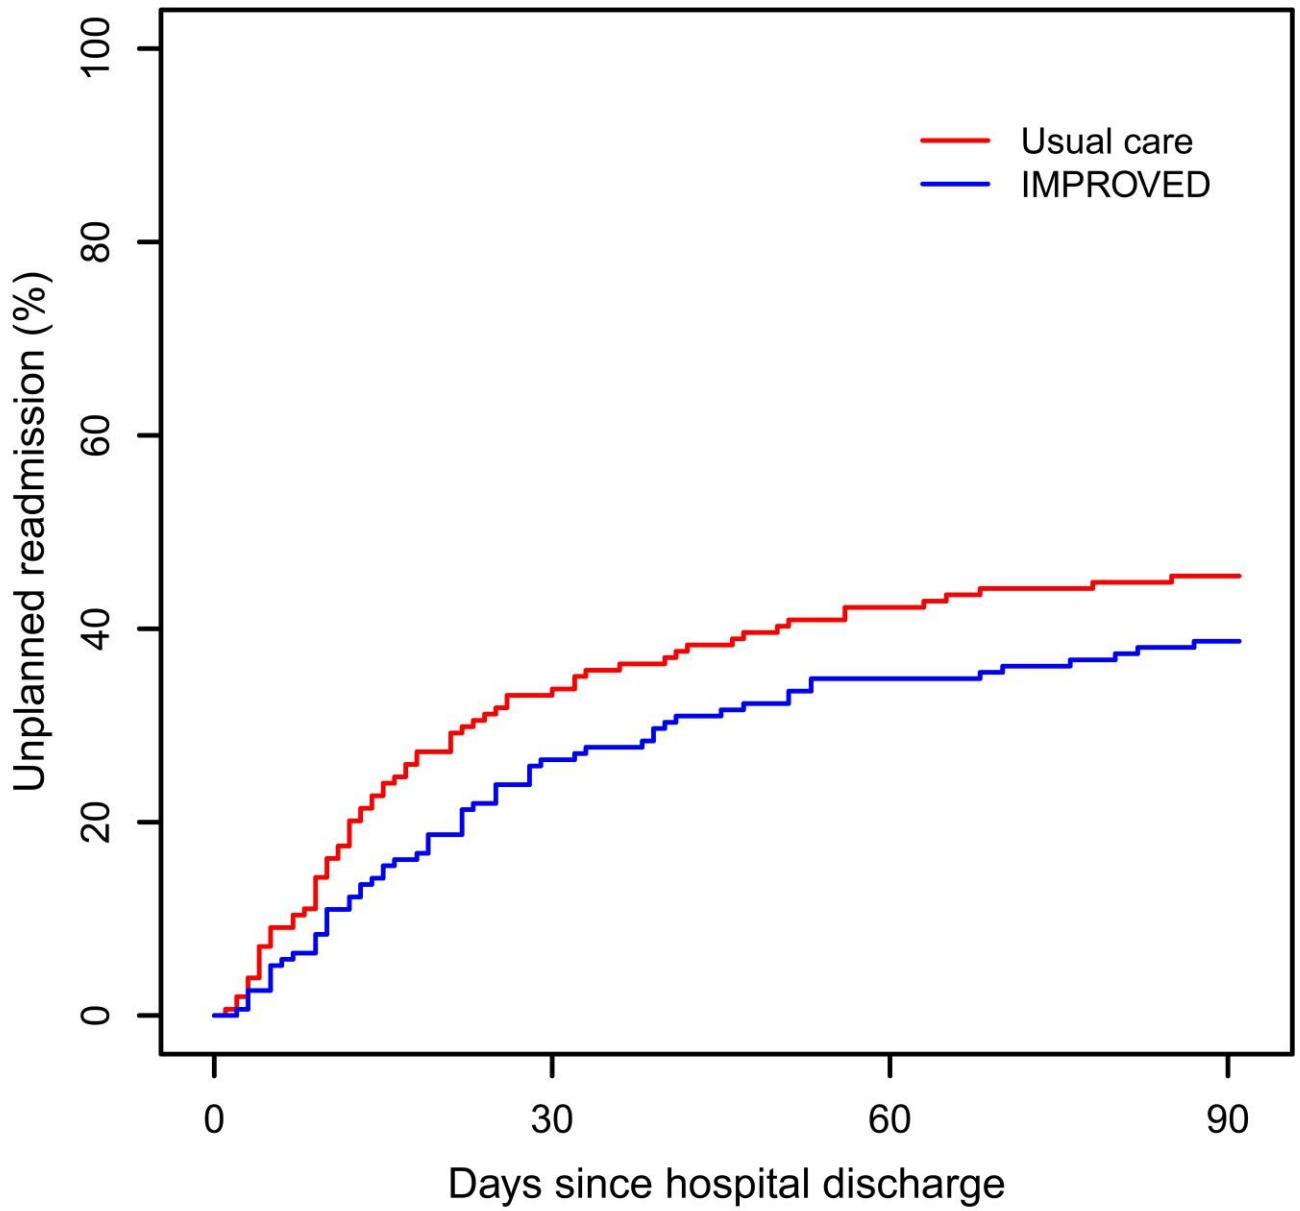

Number at risk

|            |     |    |    |    |
|------------|-----|----|----|----|
| Usual care | 154 | 90 | 65 | 57 |
| IMPROVED   | 155 | 91 | 68 | 57 |
