# Supplementary material
Source: PubMed Central journal article supplement (PMC8832303)
Supplement: jamaoncol-e217643-s003.pdf [file jamaoncol-e217643-s003.pdf]

## **Data Sharing Statement**

Nipp. Effect of a Symptom Monitoring Intervention for Patients Hospitalized With Advanced Cancer. *JAMA Oncol.* Published February 10, 2022. doi:10.1001/jamaoncol.2021.7643

### **Data**

**Data available:** No

### **Additional Information**

**Explanation for why data not available:** n/a
